# Supplementary material for: Apoptosis, autophagy, cell cycle arrest, cell invasion and BSA-binding studies in vitro of ruthenium(ii) polypyridyl complexes
Source: Royal Society of Chemistry journal article supplement (doi:10.1039/c6ra11391e), 2016-01-01
Supplement: c6ra11391e1.pdf [file c6ra11391e1.pdf]

## Supporting information

**Fig. S1** The UV-Vis spectra of the complexes **1-4** in DMF (a), DMSO (b), CH<sub>3</sub>CH<sub>2</sub>OH (c), CH<sub>3</sub>OH (d) and CH<sub>3</sub>CN (e) at room temperature.

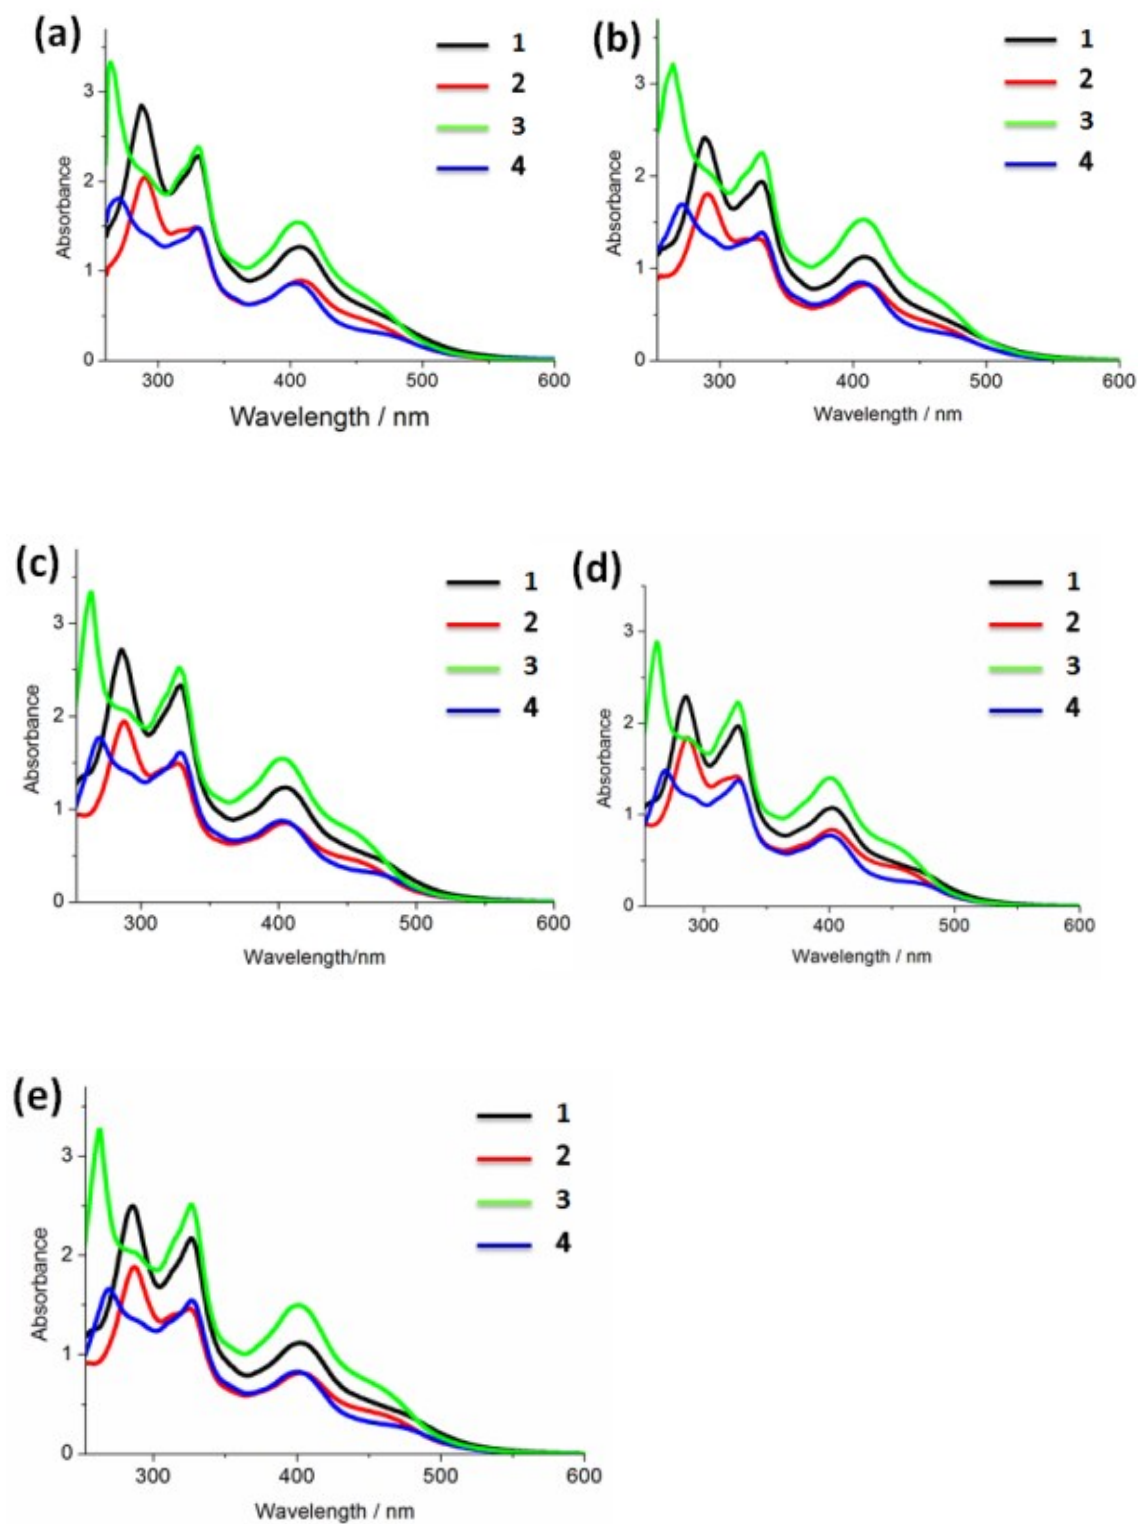

**Fig. S2** Apoptosis of A549 cells (a) exposure to 3.13 and 6.25  $\mu\text{M}$  of complexes **1** (b and c), **2** (d and e), **3** (f and g) and **4** (h and l) for 24 h. L, N and A stand for living, necrotic and apoptotic cells.

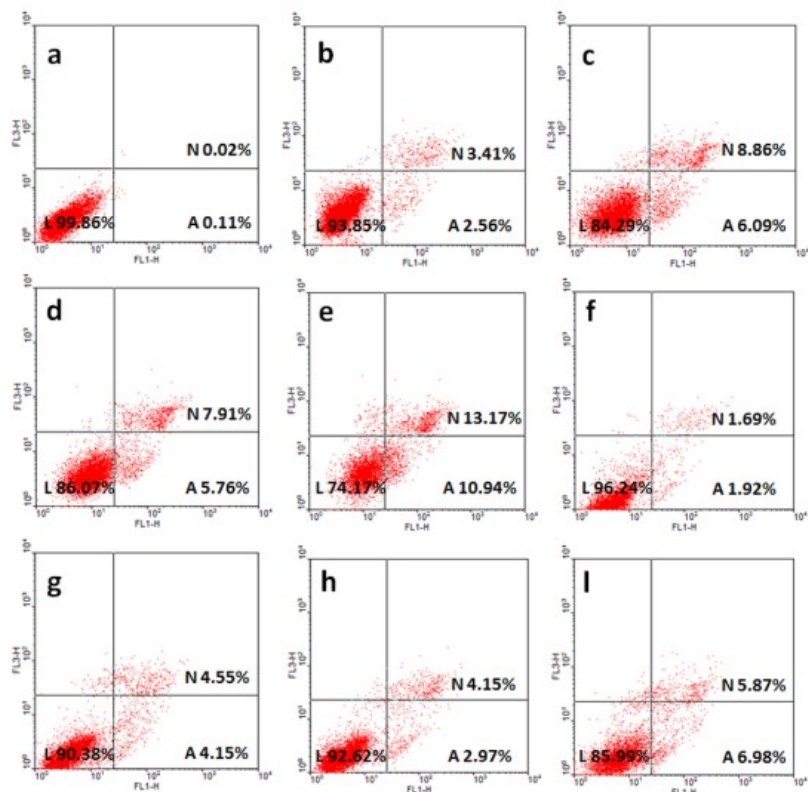

**Fig. S2**

**Fig.S3** Images of A549 cells exposure to 3.13  $\mu\text{M}$  of complexes **1-4** and stained with DAPI at 37  $^{\circ}\text{C}$  for 24 h.

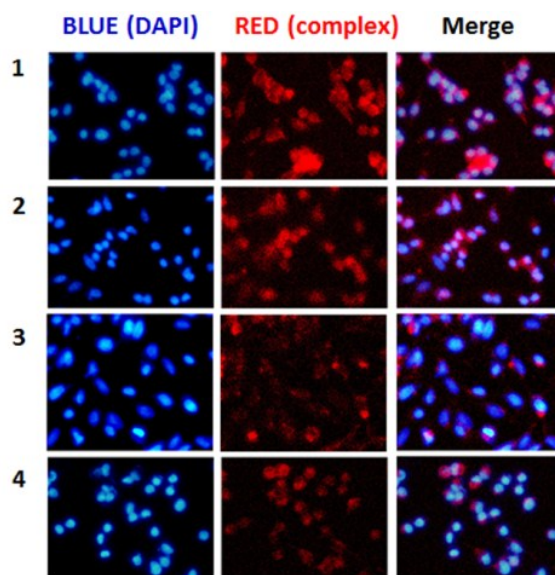

**Fig. S3**

**Fig. S4** The absorption spectra of BSA in the absence and presence of different concentration of complexes **1** (a), **2** (b), **3** (c) and **4** (d). Arrow shows the absorbance changing upon the increase of complexes concentration.

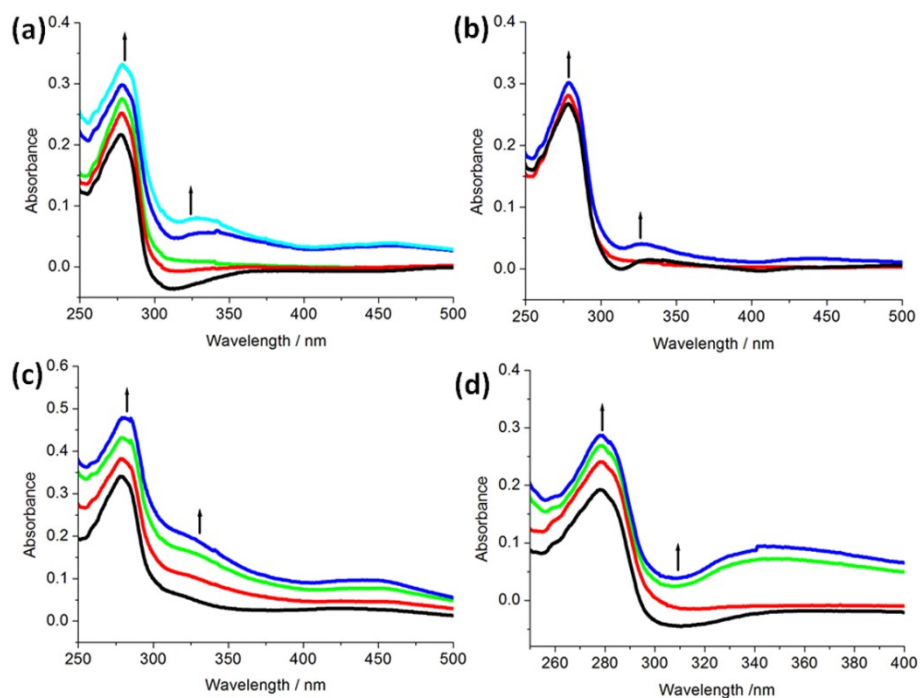

Fig. S4
